# Supplementary material
Source: PubMed Central journal article supplement (PMC4382045)
Supplement: supp_3.1.E8_2013-0034_original_submission.pdf [file supp_3.1.E8_2013-0034_original_submission.pdf]

1  
2  
3  
4  
5  
6  
7  
8  
9  
10  
11  
12  
13  
14  
15  
16  
17  
18  
19  
20  
21  
22  
23  
24  
25  
26  
27  
28  
29  
30  
31  
32  
33  
34  
35  
36  
37  
38  
39  
40  
41  
42  
43  
44  
45  
46  
47  
48  
49  
50  
51  
52  
53  
54  
55  
56  
57  
58  
59  
60

## Secular trends in ESKD incidence and prevalence in Canada over 27 Years: An Emerging Epidemic in the North

Paul Komenda<sup>1,3,6</sup>

Nancy Yu<sup>2</sup>

Stella Leung<sup>3</sup>

Yichun Wei<sup>3</sup>

James Blanchard<sup>3</sup>

Keevin Bernstein<sup>1,5,6</sup>

Rolf Puchtinger<sup>7</sup>

Manish M Sood<sup>1,4,6</sup>

Claudio Rigatto<sup>1,3,6</sup>

Navdeep Tangri<sup>1,2,3,6</sup>

1 - University of Manitoba, Department of Medicine, Section of Nephrology. Winnipeg, Canada

2 - University of Manitoba, Department of Community Health Sciences, Winnipeg, Canada

3 - Seven Oaks General Hospital. Winnipeg, Canada

4 - Saint Boniface Hospital. Winnipeg, Canada

5 - Health Sciences Centre. Winnipeg, Canada

6 - Manitoba Renal Program. Winnipeg, Canada

7 – Manitoba Health

### Corresponding Author:

Dr. Paul Komenda

Seven Oaks General Hospital Renal Program

2300 McPhillips Street

Winnipeg, MB, Canada R2V 3M3

[Paulkomenda@yahoo.com](mailto:Paulkomenda@yahoo.com)

**Abstract**

Introduction: End Stage Kidney Disease (ESKD) requiring dialysis is costly, and associated with disproportionately poor health outcomes and quality of life. It is therefore important to understand long-term secular trends in dialysis incidence and prevalence. As Canada is a large geographically diverse country, understanding regional dialysis trends will allow for the alignment of appropriate and efficient care delivery. The primary objective of this study was to describe long term secular and geographic trends in ESKD over 27 years in a single provider Canadian healthcare setting.

Methods: We used the Manitoba Renal Program ESKD registry to validate several administrative case definitions of ESKD in the universal provider Manitoba Health repository over a 7-year time horizon. Using the best performing case definition, we described the annual incidence and prevalence of ESKD in Manitoba from 1984-2010 stratified by age, sex and geographic location within the province.

Results: Over 1.2 million records within the repository were searched. We identified 9489 individuals in the Manitoba Health Physician Claims database with at least one claim for dialysis from April 1, 1984 through March 31, 2011. The most specific and least sensitive case definition was any two dialysis treatment claims >90 days apart with no gaps in treatments greater than 21 days (99.96% specific, 46% sensitive). Over this time period, the total annual incidence of ESKD increased 2.5-fold from 15.8 to 40.2/100,000. Of note, the northern rural portions of the province saw a 12 fold unadjusted increase in ESKD from 8.12 in 1984 to 96.34/100,000 in 2009.

Conclusions: The incidence and prevalence of ESKD is increasing, most dramatically in the remote rural North. Innovative interventions such as primary screening and treatment initiatives should specially target Northern rural regions. Our case definitions of ESKD should be applied to other jurisdictions with long term administrative data to examine secular trends in this resource intense disease with devastating public health consequences.

## Introduction

End Stage Kidney Disease (ESKD) requiring life sustaining kidney replacement therapy is a global public health problem(1) affecting over 2 million people worldwide and over 38,000 Canadians(2)(3).

Manitoba has the highest incidence and prevalence of ESKD in Canada, in part due to its high burden of diabetes.(2). ESKD is associated with unacceptably high rates of morbidity and mortality (4), diminished quality of life (5) and disproportionately high costs to the health care system (6).

Worldwide secular trends of ESKD incidence and prevalence rates are challenging to illustrate due to variable population dynamics, the heterogeneous availability of dialysis services in certain countries, and differences in the generalizability of dialysis registries. (3)(7). Countries with well-developed registries and broad availability of dialysis services such as the United States and Canada have reported a relative slowing of the incidence of ESKD over the last decade(8)(2). There remains, however major variability across regions within these countries with regards to incidence, prevalence, modality choice and rates of treated ESKD. Canada, being geographically broad with a large rural Northern region, has unique challenges for health care delivery and disease surveillance. Unfortunately little data exists regarding secular trends in ESKD rate by geographic region.

Many comprehensive dialysis provider databases and registries within Canada are limited in their retrospective time horizon. Review of longitudinal administrative data remains an attractive option for analysis of secular trends in dialysis growth. If accurate, these data will aid in the creation of surveillance and prevention programs that may be applied to more efficiently address the burden of ESKD. The primary objective of this study was to examine the incidence, prevalence and geographic trends of ESKD over 27 years using novel and validated administrative case definitions. These long term trends may provide novel insights into the way contemporary CKD surveillance prevention efforts should be targeted.

## Methods

### *Study Population*

The setting of this study was Manitoba, Canada with a population of 1.2 million. Manitoba is a central Canadian province with a universal payor health care system (Manitoba Health) which processes and maintains all claims for health care utilization in the province in a secured, centralized repository(9).

1 Since 1984, all Manitoba residents have a unique personal health identification number which is  
2 attached to all health services claims submitted to Manitoba Health, who maintains computerized  
3 records of these claims.  
4  
5  
6  
7

#### 8 *Study Data Sources*

##### 9 ***Physician Claims Database***

10 Each physician claim includes the patient's identification number, date of service, and three digit  
11 International Classification of Disease (ICD)-9-CM code for the physician-assigned diagnosis. Each  
12 hospitalization record includes the patient's identification number, dates of admission and discharge,  
13 and up to 25 diagnostic codes listed on the discharge abstract using ICD-10-CA codes after 2004. Prior to  
14 2004, up to 16 diagnoses were recorded using five-digit ICD-9-CM codes. Manitoba Health also  
15 maintains a population registry, which is updated when an individual moves into or out of Manitoba,  
16 changes marital or family status, or dies.  
17  
18  
19  
20  
21  
22  
23  
24

25 To identify residents receiving dialysis in the Manitoba Health database, we searched all physician claims  
26 from April 1, 1984 through March 31, 2011 for procedures performed by physicians by Tariff codes for  
27 initial dialysis (9798, 9801, 9805, 9806), subsequent dialysis (9799, 9802, 9807, 9819) and home dialysis  
28 (9821).  
29  
30  
31  
32

##### 33 ***Manitoba Renal Program Dialysis Registry***

34 The Manitoba Renal Program (MRP) is the sole provider of dialysis and kidney health prevention services  
35 in the Province consisting of over 800 employees including 23 actively practicing nephrologists. The  
36 MRP has maintained a comprehensive database of all patients receiving chronic dialysis (>90 days on  
37 dialysis) including start and end dates in addition to detailed demographic and comorbidity data since  
38 January 2004. The quality of these data is adjudicated at formal interprofessional rounds on a weekly  
39 basis. The validation of this database has been described elsewhere and has been used extensively in  
40 published epidemiologic studies. {{2465 Sood, M.M. 2010;(10) }}  
41  
42  
43  
44  
45  
46  
47

##### 48 ***Administrative case definition for Dialysis***

49 Definitions of disease states and diagnoses using administrative data sources must be validated using  
50 traditional sources of clinical data to verify accuracy and validity (patient charts, registries, electronic  
51 medical records, or self-report disease status diagnosed by doctors)(11).  
52  
53  
54

55 We developed several administrative case definitions, varying the number of physician claims required  
56 to classify a person on dialysis. We based these candidate case definitions on previous validation  
57  
58  
59  
60

1 studies using administrative data to define ESKD (12) including: at least one outpatient claim, at least  
2 two outpatient claims, at least two outpatient claims and at least ninety days apart and continuous  
3 outpatient claims at least ninety days apart with no gap in claims greater than twenty-one days. We  
4 compared the classifications of study cases according to the administrative case definitions and to  
5 records of MRP Dialysis Registry by computing sensitivity, specificity, and positive and negative  
6 predictive value.  
7  
8  
9  
10  
11

### 12 ***Incidence and Prevalence***

13  
14 To estimate the incidence of chronic dialysis, we examined longitudinal records of medical claims for all  
15 individuals who met the administrative case definition for chronic dialysis. We considered the date of  
16 the first physician claim for a dialysis code to be the date of dialysis onset (incident case date). We  
17 calculate the incidence rates since 1989 to ensure identifying new dialysis cases by using a 5-year  
18 washout period (1984-1988). People on dialysis and alive in each year were counted as prevalent dialysis  
19 cases. Using the year of dialysis of incident and prevalent cases, we calculated the annual crude  
20 incidence/prevalence rates using the mid-year population figures from the Manitoba Health population  
21 registry for denominators in the crude rate calculations and 2001 Canadian population for the direct  
22 age- and sex-adjusted rates (13). Ninety-five percent confidence intervals were calculated assuming a  
23 Poisson distribution. Temporal trends were examined in the age-adjusted incidence and prevalence  
24 using a linear regression model. Using patient postal codes we reported home region of origin dividing  
25 the province into 4 regions by approximate distance from Winnipeg (the major tertiary care center):  
26 north rural (>300 km), mid rural (50-300 km North), south rural (50-300 km South) and urban  
27 (Winnipeg). We chose these geographic regions as surrogates for differential access to reliable,  
28 accessible primary and specialty care services mirrored by parameters such as population density and  
29 well-developed road access to communities. All programming and statistics were done using SAS (v9).  
30  
31  
32  
33  
34  
35  
36  
37  
38  
39  
40  
41  
42  
43  
44

### 45 ***Standard Protocol Approval, Registration, and Patient Consents***

46 This study received appropriate health research ethics board approvals from the University of Manitoba  
47 and the Winnipeg Regional Health Authority. Health Information Privacy Committee approval was  
48 obtained from Manitoba Health and data sharing agreements were signed between these institutions.  
49 Individual consents for patients to have their data included in the Manitoba Renal Program database  
50 were obtained.  
51  
52  
53  
54  
55  
56  
57  
58  
59  
60

## Results

Using the administrative tariff codes for dialysis conducted by physicians, we identified 9489 individuals in the Manitoba Health Physician Claims database with at least one record for dialysis from April 1, 1984 through March 31, 2011.

We chose the study period of January 1<sup>st</sup> 2004 to December 31<sup>st</sup> 2010 based on the available, high quality data within the MRP for validation purposes. Within the MRP database we identified 2562 individuals on dialysis from January 1 2004 to December 31, 2010 and 10,236 as CKD non-dialysis patients. The age and sex distribution of the MRP chronic dialysis sample is shown in Table 1. The patients on dialysis were more likely to be men (54.06% versus 45.94 %,  $p < 0.0001$ ) and the mean age was 59.69 (SD = 15.93).

### ***ESKD Case Definition Validation***

We tested our administrative case definitions of chronic dialysis in our MRP cohort, all of whom had at least one physician claim for dialysis (Table 1). Based on these findings and to balance competing needs for sensitivity and specificity of the definition, our results are presented in Table 2 for the four case definitions we explored. Using MRP data of those on dialysis more than 90 days as the gold standard for a diagnosis of ESKD, the most sensitive case definition was any one dialysis treatment claim (65% sensitive, 94% specific). The most specific and least sensitive case definition was any two dialysis treatment claims >90 days apart with no gaps in treatments greater than 21 days (46 % sensitive, 99.96% specific).

As we increased the time interval during which dialysis claims were searched for by one year increments, the sensitivity of all case definitions improved considerably. Increasing the required days of chronic dialysis (i.e.  $\geq 90$  days) increased the specificity of the case definition, while decreasing the days on dialysis increased sensitivity. Accuracy and agreement (kappa) scores were highest for the case definition of any two outpatient dialysis claims (0.84, 0.63 respectively in calendar year 2004). These scores improved to 0.93 and 0.82 if we widened the time interval to include years 2004-2009. We therefore applied this case definition moving forward in our analysis of longitudinal secular trends of dialysis utilization over the entire repository of available administrative data in Manitoba from 1984 – 2011.

### ***Incidence and prevalence***

We applied our validated case definition of ESKD to the comprehensive administrative data set from 1984 to 2011. Figure 1 shows the age adjusted incidence and prevalence of ESKD in Manitoba (stratified by sex) over this 27 year time horizon demonstrating a slow increase in incidence over time, accompanied by a much more rapid rise in disease prevalence. In 1984, the provincial age adjusted incidence of ESKD was 16.88/100,000 rising to 37.78/100,000 in 2010. During the same time period, age adjusted prevalence went from 32.46/100,000 to 270.31/100,000; an 8-fold rise over the 27 year period. The age adjusted incidence and prevalence rates are higher in males over females, with prevalence rates of 3 % in males and 2.5 % in females by the end of 2010.

### ***Prevalence by Age***

Figure 2 shows prevalence rates stratified by age category. These findings demonstrate that the prevalence of ESKD has increased broadly, across every age category in the last 27 years. However, the overall increased prevalence rates of ESKD over time is now being largely driven by those in the three 55-85 age categories, with the largest relative increase in the 85+ category since the year 2000. Prevalence rates of ESKD appear again to be increasing with age with rates of 8 % in the 75-84 age deciles in comparison with rates of < 1 % in the same age group 27 years ago. Finally, the peak prevalence of ESKD by age has also shifted over the last two decades, with the peak now being 75-84, as compared with 65-74 in the 1980s.

### ***Incidence and Prevalence by Region***

Figures 3a and 3b show age-standardized incidence rates of ESKD in Manitoba stratified by geographic region. In the urban and southern/mid rural regions of Manitoba, incidence rates increased only 2-fold from 10-20/100,000 in the early 1980's to 30-40/100,000 in 2008-2010. In contrast ESKD incidence increased 12 fold from 10/100,000 in 1984 to 120/100,000 in 2010 in the rural remote north of Manitoba. Similar findings are seen with disease prevalence rates, with threefold higher disease prevalence in the rural remote north compared to other regions, and an approximately 50 fold higher prevalence in the 2010 northern population, when compared to the population from 1984.

## Discussion

Employing a validated ESKD case definition over 27 years of data, we found an alarming, disproportionate increase in the rate of ESKD in the remote, rural North. The provincial age adjusted prevalence of ESKD has increased 8-fold over 3 decades of study. These findings suggest that despite a reported plateau in incidence and prevalence rates of ESKD in Canada, the population of patients with ESKD in Manitoba continues to rapidly increase. This increase is largely driven by elderly patients and those residing in rural remote Northern communities. These findings have significant public health implications for policy makers and health care providers. Urgent attention is needed to apply innovative public health interventions in surveillance and early, risk based prevention strategies in attenuating this trend.

The 12-fold increase in the age-adjusted rural, northern rate of ESRD is remarkable, especially in contrast with trends in southern regions of Manitoba and the rest of Canada, where growth appears to be leveling off. Several factors may contribute to this epidemic of ESKD. Canada's north faces unique challenges related to low population density, with many isolated communities having limited access to health care resources (14). Patients within the Northern, remote and rural regions of Manitoba are more likely to be Aboriginal and to have sociodemographic characteristics associated with poor health outcomes, including poverty, unemployment, and lower levels of formal education than their urban counterparts(14, 19, 20). Aboriginal people in Canada have a 2-3 fold increased prevalence of ESKD (15), are more likely to initiate renal-replacement therapy on hemodialysis, and are much less likely to receive a kidney transplant compared to non-Aboriginals (16). Canada's North also suffers a higher burden of other chronic diseases, including cardiovascular and respiratory diseases (e.g. tuberculosis), and certain types of cancer (notably cervical, breast, melanoma, and prostate), as well as shorter life expectancy(21) (18, 20). These phenomena are not unique to Canada; a higher incidence ESKD attributed to diabetes has been described in rural US populations with less access to primary care (17). The combination of demography, geography and climate all potentially contribute to the high rate of CKD and ESKD although there is likely a strong modifying effect of lower socioeconomic status on the increased incidence of preventable ESKD (18).

The Canadian Organ Replacement Registry has reported on the changing demographics of ESKD incidence and prevalence since 2001(2). Manitoba consistently has the highest incidence prevalence of



1  
2  
3  
4  
5  
6  
7  
8  
9  
10  
11  
12  
13  
14  
15  
16  
17  
18  
19  
20  
21  
22  
23  
24  
25  
26  
27  
28  
29  
30  
31  
32  
33  
34  
35  
36  
37  
38  
39  
40  
41  
42  
43  
44  
45  
46  
47  
48  
49  
50  
51  
52  
53  
54  
55  
56  
57  
58  
59  
60

ESKD and dialysis utilization in Canada within this report. The Manitoba Renal Program, which has maintained detailed program level dialysis, demographic and comorbidity data since 2004 is the sole provider of dialysis services in the province. Manitoba therefore serves as an ideal province in which to validate case definitions of ESKD using administrative data over time. In addition, this province has a vested interest in examining detailed epidemiologic trends in ESKD incidence and prevalence to tailor surveillance and prevention efforts and perform detailed demand forecasting for optimal resource allocation.

The majority of patients on chronic facility based hemodialysis engage the health care system at least thrice weekly. Patients on home dialysis therapies are typically billed for by physicians on a weekly basis. These engagements are tracked with unique procedural codes for dialysis. This provides an ideal platform for administrative case definitions to be validated against program level clinical data. Manitoba has a relatively comprehensive dialysis registry which covers almost all the patients on dialysis. Linking administrative data and dialysis registry provide a unique opportunity of validating an administrative data-based algorithm for identifying ESKD patients through administrative database.

Our study demonstrates that valid, reliable case definitions for ESKD status can be derived from administrative claims data. Within a universal payor system such as Canada, health care claims data have several potential advantages over other databases such as hospital based electronic patient records, outpatient electronic medical records and disease specific registries as they are typically a more universal source of population level data (i.e. not specific to a certain health care setting) and they document every health care system interaction. These claims data may serve as a valuable tool to track the epidemiology of ESKD at a population level. A liberal time interval should be utilized in case finding for ESKD patients with administrative data sets, as accuracy and agreement scores are suboptimal when validated against gold standard program databases when only one calendar year is used. While others have published secular trends in ESKD using administrative data, these definitions were not internally validated against program level data for sensitivity and specificity over a long time horizon and should be interpreted with caution (15) given our experience in this study. Our case definitions were based on a previous Canadian study using Alberta data over a 1-year period finding kappa statistics for their four definitions ranging from 0.693 – 0.793(12). Our agreements were similar, although we discovered significant improvement in performance for case definitions as time horizons were broadened. The most likely explanations for this improvement in performance over a broader time horizon include

1  
2 delays in submitting claims on the provider side in addition to delays or disputes in processing claims on  
3 the payor side.  
4

5  
6  
7 There are several clinical, research and policy implications to our findings. Firstly, our findings suggest  
8 that screening for diabetes, hypertension and kidney disease, as well as treatment for the prevention of  
9 kidney failure in patients with established CKD should be preferentially targeted at rural and remote  
10 Northern Regions. While there are challenges that exist in providing health services in these regions, the  
11 payoffs are likely to be larger. Secondly, research is needed to more accurately identify the biological  
12 determinants of a poor renal prognosis in patients who reside in these communities. Engagement of the  
13 aboriginal community in these research efforts is critical for success. Finally, we believe that kidney  
14 disease and its prevention and treatment should be considered a strategic priority in health care funding  
15 for aboriginal communities, and that present and future funding initiatives should be critically evaluated  
16 for their efficacy in reducing the incidence of kidney failure.  
17  
18  
19  
20  
21  
22  
23

24  
25  
26 The strengths of this study include a single payor health care system with complete capture of all dialysis  
27 events within Manitoba on both the payor and provider side to develop valid administrative case  
28 definitions of ESKD. An extended time horizon is a major advantage of our study over other work done  
29 in this area to ensure full capture of all dialysis events. The examination of a 27 year time horizon is not  
30 possible with most current dialysis registries limiting the power of long term secular trend analyses.  
31  
32  
33  
34

35  
36 Our study has some limitations. The MRP database is maintained and adjudicated for outcomes on a  
37 weekly basis, but there is a possibility of patients being omitted from the registry. We expect that this  
38 number is small. Our determination of patient region was by postal code derived from the Manitoba  
39 Health repository; however this may not always take into account actual location of patient residence  
40 and patient migration for work, other chronic conditions, etc. We did not explore our analysis within  
41 the Northern region of Manitoba stratified by specific community, road access, or proximity to a satellite  
42 hemodialysis facility due to limitations in collecting location data to this level of granularity using only  
43 postal code.  
44  
45  
46  
47  
48  
49

## 50 51 **Conclusion**

52  
53  
54  
55 Urgent attention is needed to support well developed primary surveillance and prevention initiatives in  
56 rural and remote locations where dialysis growth remains disproportionately high. Despite the  
57  
58  
59  
60

1  
2 availability of well-developed reporting systems in Canada such as the Canadian Organ Replacement  
3 Register, there is additional value in examining long-term secular trends in dialysis derived from  
4 validated administrative case definitions of ESKD to explain regional variations in incidence and  
5 prevalence rates. Our case definitions are readily transferable to other jurisdictions with available  
6 longitudinal administrative data.  
7  
8  
9

10  
11  
12 Further study is needed to examine the cost utility of investing in primary surveillance and prevention  
13 initiatives as opposed to the construction of dialysis facilities in locations of low population density.  
14  
15  
16  
17  
18  
19  
20  
21  
22  
23  
24  
25  
26  
27  
28  
29  
30  
31  
32  
33  
34  
35  
36  
37  
38  
39  
40  
41  
42  
43  
44  
45  
46  
47  
48  
49  
50  
51  
52  
53  
54  
55  
56  
57  
58  
59  
60

Confidential

Table 1. Age and sex distribution of the Manitoba Renal Program Dialysis Registry (2004-2010).

| Age (years)  | Men N (%)                 | Women N (%)               | Men : Women | Women & Men N (%) |
|--------------|---------------------------|---------------------------|-------------|-------------------|
| ≤24          | 25 (0.98)                 | 30 (1.17)                 | 0.84        | 55 (2.15)         |
| 25-29        | 29 (1.13)                 | 30 (1.17)                 | 0.97        | 59 (2.3)          |
| 30-34        | 38 (1.48)                 | 48 (1.87)                 | 0.79        | 86 (3.36)         |
| 35-39        | 61 (2.38)                 | 47 (1.83)                 | 1.30        | 108 (4.22)        |
| 40-44        | 79 (3.08)                 | 75 (2.93)                 | 1.05        | 154 (6.01)        |
| 45-49        | 107 (4.18)                | 81 (3.16%)                | 1.32        | 188 (7.34)        |
| 50-54        | 140 (5.46)                | 93 (3.63)                 | 1.50        | 233 (9.09)        |
| 55-59        | 183 (7.14)                | 130 (5.07)                | 1.41        | 313 (12.22)       |
| 60-64        | 165 (6.44)                | 152 (5.93)                | 1.09        | 317 (12.37)       |
| 65-74        | 558 (21.78)               | 491 (19.16)               | 1.14        | 1049 (40.94)      |
| 75-84        | 209 (8.16)                | 189 (7.38)                | 1.11        | 398 (15.53)       |
| 85+          | 55 (2.15)                 | 51 (1.99)                 | 1.18        | 106 (4.14)        |
| <b>Total</b> | 1385 (54.06) <sup>a</sup> | 1177 (45.94) <sup>b</sup> | 1.18        | 2562 <sup>c</sup> |

<sup>a</sup> Mean (SD) age 59.80 (15.48) y.

<sup>b</sup> Mean (SD) age 59.56 (16.45) y.

<sup>c</sup> Mean (SD) age 59.69 (15.93) y.

Table 2. Average Annual Incidence (AAI) of ESKD in Manitoba per 100,000 Population by Age and Sex, 1989 – 2010.

| Age (years)  | Women               |       |             | Men                 |        |               | Women : Men |           |
|--------------|---------------------|-------|-------------|---------------------|--------|---------------|-------------|-----------|
|              | No. Cases 1989-2010 | AAI   | 95% CI      | No. Cases 1989-2010 | AAI    | 95% CI        | Rate ratio  | 95% CI    |
| <b>0-24</b>  | 163                 | 2.89  | 2.48-3.36   | 179                 | 3.04   | 2.62-3.52     | 0.95        | 0.77-1.17 |
| <b>25-29</b> | 74                  | 6.21  | 4.94-7.79   | 94                  | 7.83   | 6.40-9.58     | 0.79        | 0.58-1.08 |
| <b>30-34</b> | 112                 | 9.29  | 7.72-11.18  | 119                 | 9.83   | 8.21-11.76    | 0.95        | 0.73-1.22 |
| <b>35-39</b> | 111                 | 9.26  | 7.69-11.15  | 183                 | 15.19  | 13.14         | 0.61        | 0.48-0.77 |
| <b>40-44</b> | 166                 | 14.46 | 12.42-16.83 | 212                 | 18.36  | 16.05-17.56   | 0.79        | 0.64-0.96 |
| <b>45-49</b> | 209                 | 19.82 | 17.31-22.70 | 306                 | 28.85  | 25.80-32.28   | 0.69        | 0.58-0.82 |
| <b>50-54</b> | 224                 | 24.21 | 21.24-27.59 | 330                 | 35.64  | 31.99-39.70   | 0.68        | 0.57-0.80 |
| <b>55-59</b> | 322                 | 39.68 | 35.57-44.26 | 430                 | 53.94  | 49.07-59.29   | 0.74        | 0.64-0.85 |
| <b>60-64</b> | 336                 | 46.54 | 41.82-51.80 | 429                 | 62.66  | 57.00-68.88   | 0.74        | 0.64-0.86 |
| <b>65-74</b> | 704                 | 57.49 | 53.40-61.90 | 939                 | 88.98  | 83.46-94.85   | 0.65        | 0.59-0.71 |
| <b>75-84</b> | 515                 | 59.07 | 54.18-64.40 | 753                 | 125.68 | 117.02-134.99 | 0.47        | 0.42-0.53 |
| <b>85+</b>   | 120                 | 32.66 | 27.31-39.06 | 150                 | 89.38  | 76.17-104.90  | 0.37        | 0.29-0.46 |

Abbreviations: CI = confidence interval.

**Appendix Table.** Sensitivity, Specificity, Positive Predictive Value (PPV), Negative Predictive Value (NPV), Accuracy and Kappa of Administrative Claims Case Definitions for Chronic Dialysis as Compared to Dialysis Registry (January 2004-December 2010)

| Number of Physician Claims              | Other conditions <sup>a</sup> | Sensitivity (95% CI)                  | Specificity (95% CI)                  | PPV (95% CI)                          | NPV (95% CI)                          | Accuracy                              | Kappa                              |
|-----------------------------------------|-------------------------------|---------------------------------------|---------------------------------------|---------------------------------------|---------------------------------------|---------------------------------------|------------------------------------|
| ≥ 1                                     | 1-year data                   | 76.97<br>(74.74, 79.2)                | 93.81<br>(90.79, 92.94)               | 85.19<br>(83.21, 87.17)               | 89.8<br>(88.74, 90.87)                | 88.49<br>(87.36, 89.61)               | 0.73<br>(0.7, 0.75)                |
| ≥ 1                                     | 3-years data                  | 74.04<br>(72.17, 75.91)               | 92.48 (91.79, 93.17)                  | 78.62 (76.82, 80.42)                  | 90.51 (89.76, 91.27)                  | 87.47 (86.61, 88.32)                  | 0.68 (0.66, 0.70)                  |
| ≥ 1                                     | 5-years data                  | 87.64<br>(86.34, 88.95)               | 91.33<br>(90.73, 91.93)               | 74.41<br>(72.82, 76.00)               | 96.25<br>(95.84, 96.67)               | 90.51<br>(89.87, 91.15)               | 0.74<br>(0.73, 0.76)               |
| ≥ 1                                     | 7-years data                  | 97.3<br>(96.68, 97.93)                | 89.67<br>(89.08, 90.26)               | 70.2<br>(68.69, 71.71)                | 99.25<br>(99.08, 99.43)               | 91.2<br>(90.62, 91.77)                | 0.76<br>(0.75, 0.77)               |
| ≥ 2                                     | 1-year data                   | 74.63<br>(72.33, 76.94)               | 94.39<br>(93.56, 95.22)               | 86.02<br>(84.04, 87.99)               | 88.94<br>(87.84, 90.04)               | 88.14<br>(87.01, 89.27)               | 0.72<br>(0.69, 0.74)               |
| ≥ 2                                     | 3-years data                  | 72.71<br>(70.81, 74.61)               | 94.23<br>(93.63, 94.84)               | 82.48<br>(80.76, 84.21)               | 90.24<br>(89.49, 91.00)               | 88.38<br>(87.56, 89.20)               | 0.70<br>(0.68, 0.71)               |
| ≥ 2                                     | 5-years data                  | 86.05<br>(84.58, 87.42)               | 93.38<br>(92.86, 93.91)               | 78.91<br>(77.36, 80.45)               | 95.88<br>(95.45, 96.31)               | 91.75<br>(91.15, 92.34)               | 0.82<br>(0.81, 0.83)               |
| ≥ 2                                     | 7-years data                  | 95.55<br>(94.75, 96.34)               | 91.79<br>(91.26, 92.32)               | 74.43<br>(72.94, 75.92)               | 98.8<br>(98.58, 99.02)                | 92.54<br>(92.01, 93.07)               | 0.79<br>(0.78, 0.8)                |
| ≥ 2, at least 90 days apart             | 1-year data                   | 64.77<br>(62.23, 67.30)               | 97.13<br>(96.52, 97.73)               | 91.25<br>(89.47, 93.02)               | 85.63<br>(84.44, 86.82)               | 86.89<br>(85.75, 88.03)               | 0.67<br>(0.65, 0.70)               |
| ≥ 2, at least 90 days apart             | 3-years data                  | 60.87<br>(58.79, 62.95)               | 99.75<br>(99.62, 99.88)               | 98.92<br>(98.36, 99.48)               | 87.22<br>(86.41, 88.04)               | 89.18<br>(88.42, 89.94)               | 0.69<br>(0.67, 0.71)               |
| ≥ 2, at least 90 days apart             | 5-years data                  | 72.02<br>(70.25, 73.80)               | 99.65<br>(99.52, 99.77)               | 98.33<br>(97.74, 98.92)               | 92.53<br>(91.99, 93.07)               | 93.48<br>(92.97, 93.98)               | 0.79<br>(0.78, 0.81)               |
| ≥ 2, at least 90 days apart             | 7-years data                  | <b>83.00</b><br><b>(81.55, 84.46)</b> | <b>98.65</b><br><b>(98.43, 98.87)</b> | <b>93.90</b><br><b>(92.91, 94.89)</b> | <b>95.87</b><br><b>(95.49, 96.25)</b> | <b>95.52</b><br><b>(95.12, 95.92)</b> | <b>0.85</b><br><b>(0.84, 0.87)</b> |
| ≥ 2, lasted >90 days, no gaps > 21 days | 1-year data                   | 52.7<br>(50.06, 55.35)                | 97.5<br>(96.93, 98.06)                | 90.69<br>(88.67, 92.71)               | 81.67<br>(80.4, 82.95)                | 83.33<br>(82.1, 84.56)                | 0.57<br>(0.54, 0.59)               |
| ≥ 2, lasted >90 days, no gaps > 21 days | 3-years data                  | 45.19<br>(43.07, 47.31)               | 99.82<br>(99.71, 99.93)               | 98.96<br>(98.32, 99.60)               | 82.99<br>(82.09, 83.88)               | 84.97<br>(84.12, 85.52)               | 0.54<br>(0.52, 0.56)               |
| ≥ 2, lasted >90 days, no gaps > 21 days | 5-years data                  | 47.59<br>(45.62, 49.57)               | 99.77<br>(99.66, 99.87)               | 98.32<br>(97.58, 99.05)               | 86.87<br>(86.21, 87.54)               | 88.11<br>(87.47, 88.75)               | 0.58<br>(0.56, 0.60)               |
| ≥ 2, lasted >90 days, no gaps > 21 days | 7-years data                  | 50.64<br>(48.71, 52.58)               | 99<br>(98.81, 99.2)                   | 92.7<br>(91.34, 94.07)                | 88.91<br>(88.34, 89.49)               | 89.93<br>(88.76, 89.89)               | 0.6<br>(0.58, 0.62)                |

Note: <sup>a</sup> 2010, 2004-2006, 2004-2008, and 2004-2010 Physician and MRP data were used for the 1-year, 3-year, 5-year, and 7-year data agreement analysis, respectively

Figure 1.

Age-standardized Incidence and Prevalence of ESKD in Manitoba per 100,000 population by Sex from 1989-2009

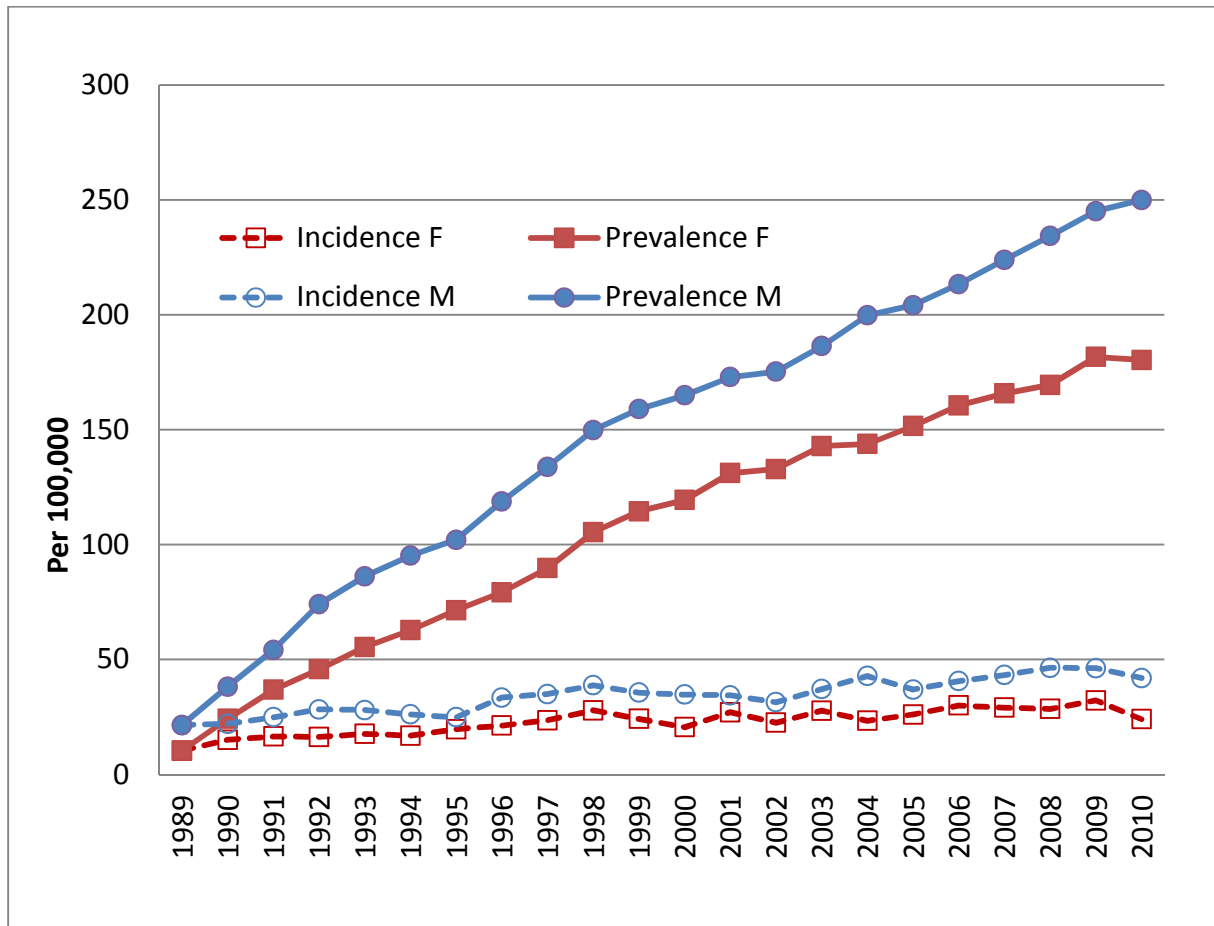

1  
2  
3  
4  
5  
6  
7  
8  
9  
10  
11  
12  
13  
14  
15  
16  
17  
18  
19  
20  
21  
22  
23  
24  
25  
26  
27  
28  
29  
30  
31  
32  
33  
34  
35  
36  
37  
38  
39  
40  
41  
42  
43  
44  
45  
46  
47  
48  
49  
50  
51  
52  
53  
54  
55  
56  
57  
58  
59  
60

Figure 2. Age-specific prevalence of ESKD in Manitoba per 100,000 population by year between 1989 and 2010

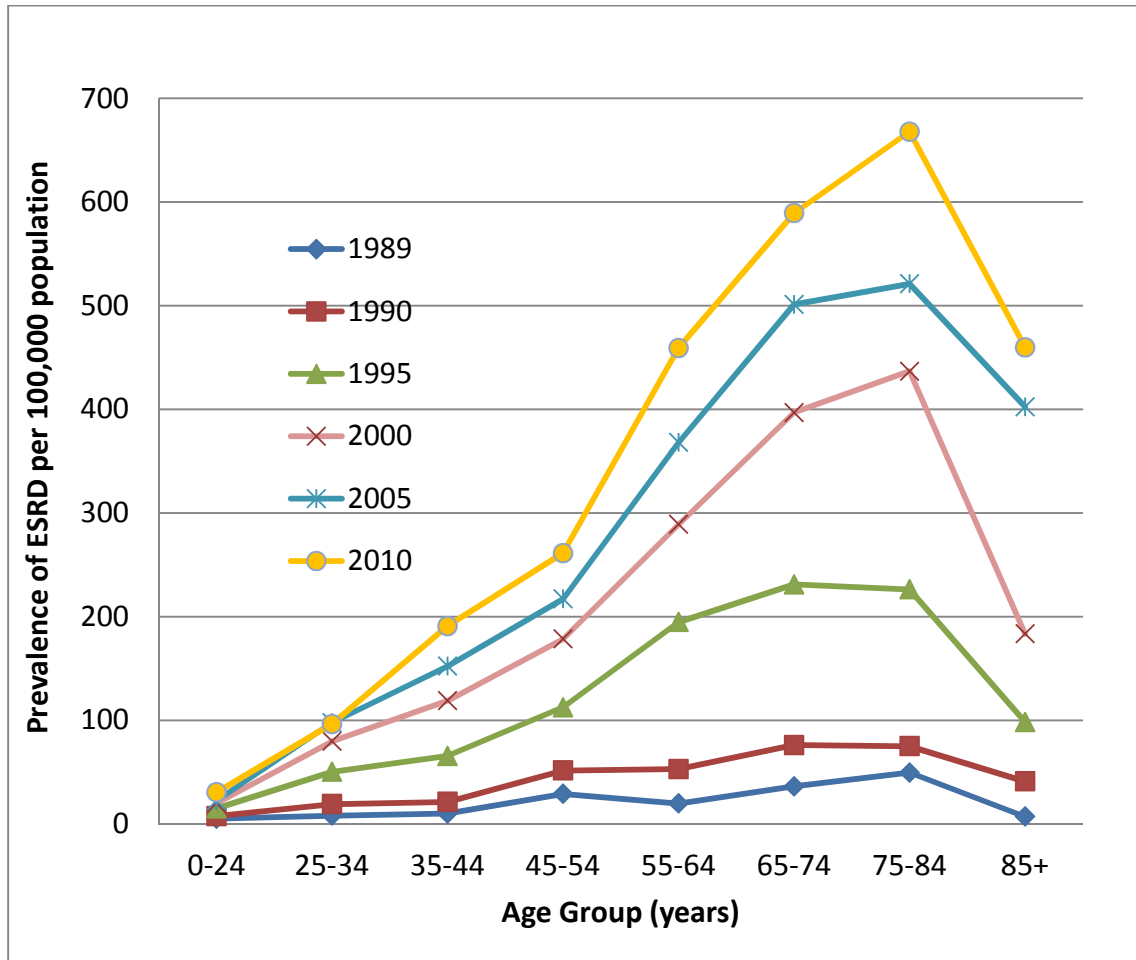



**Figure 3a.** Age-standardized Incidence of ESKD in Manitoba by regions per 100,000 populations from 1989 to 2010

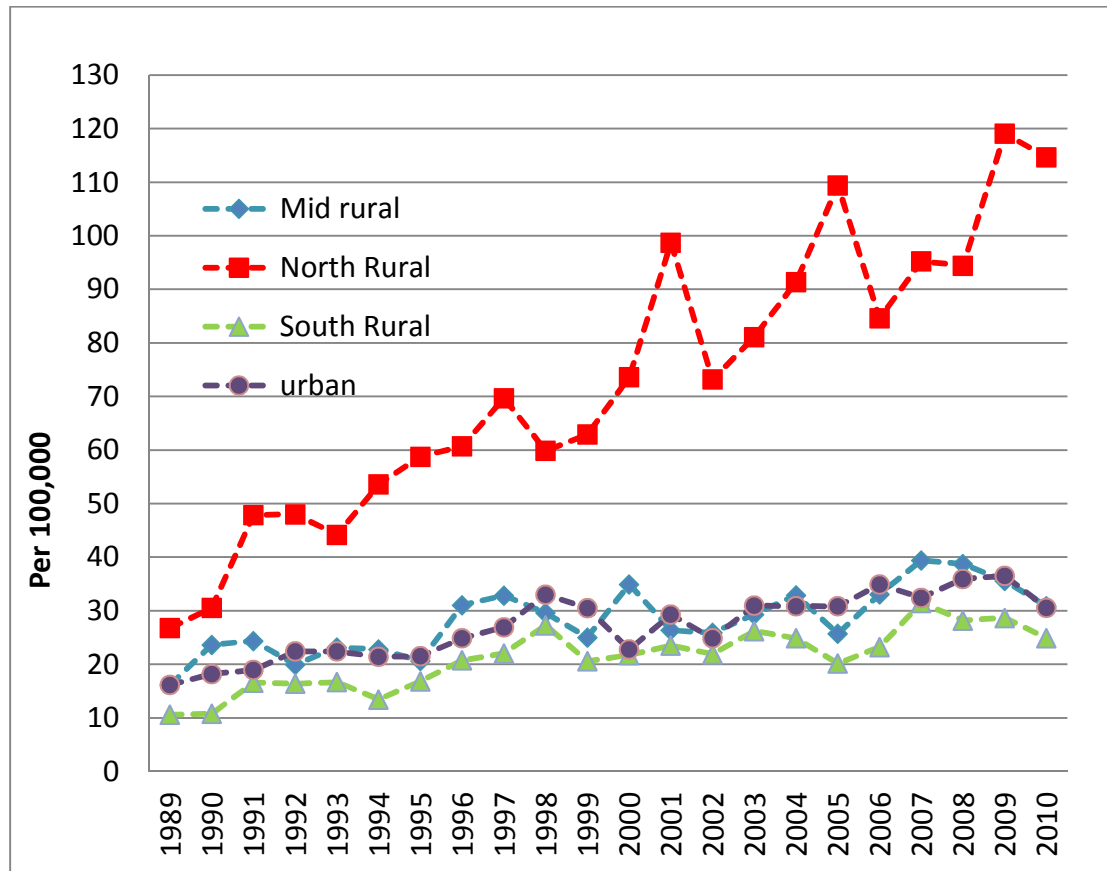

1  
2  
3  
4  
5  
6  
7  
8  
9  
10  
11  
12  
13  
14  
15  
16  
17  
18  
19  
20  
21  
22  
23  
24  
25  
26  
27  
28  
29  
30  
31  
32  
33  
34  
35  
36  
37  
38  
39  
40  
41  
42  
43  
44  
45  
46  
47  
48  
49  
50  
51  
52  
53  
54  
55  
56  
57  
58  
59  
60

**Figures 3b.** Age –standardized prevalence of chronic dialysis per 100,000 populations in Manitoba by region from 1989 to 2010

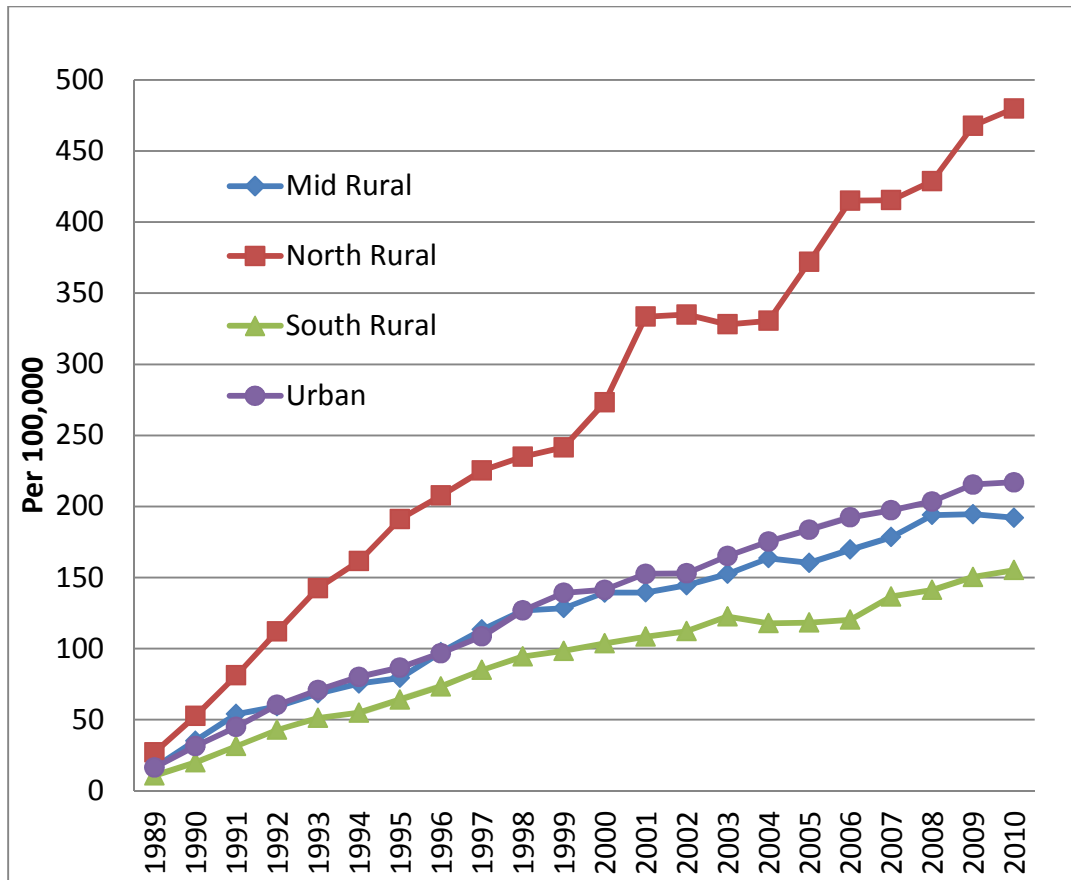

## References

1. Levey AS, Atkins R, Coresh J, Cohen EP, Collins AJ, Eckardt KU, et al. Chronic kidney disease as a global public health problem: Approaches and initiatives - a position statement from kidney disease improving global outcomes. *Kidney Int.* 2007 Aug;72(3):247-59.
2. Canadian Institute for Health Information. Canadian organ replacement register annual report: Treatment of end stage organ failure in Canada 2001-2010. Ottawa, Canada: CIHI; 2012.
3. Eggers PW. Has the incidence of end-stage renal disease in the USA and other countries stabilized? *Curr Opin Nephrol Hypertens.* 2011 May;20(3):241-5.
4. Kucirka LM, Grams ME, Lessler J, Hall EC, James N, Massie AB, et al. Association of race and age with survival among patients undergoing dialysis. *JAMA.* 2011 Aug 10;306(6):620-6.
5. Osthus TB, von der Lippe N, Ribu L, Rustoen T, Leivestad T, Dammen T, et al. Health-related quality of life and all-cause mortality in patients with diabetes on dialysis. *BMC Nephrol.* 2012 Aug 3;13(1):78.
6. McFarlane P, Komenda P. Economic considerations in frequent home hemodialysis. *Semin Dial.* 2011 Nov-Dec;24(6):678-83.
7. Eggers PW. The aging pandemic: Demographic changes in the general and end-stage renal disease populations. *Semin Nephrol.* 2009 Nov;29(6):551-4.
8. USRDS . Annual data report: Atlas of chronic kidney disease and end-stage renal disease in the United States, National Institutes of Health, National Institute of Diabetes and Digestive and Kidney Diseases, Bethesda, MD, 2011. Bethesda, MD: United States Renal Data System; 2011.
9. Health Information Management Branch. Health information management branch, *population report*. 2008, Manitoba Health and Healthy Living: Winnipeg, Manitoba. Winnipeg, MB: Manitoba Health and Healthy Living; 2008.
10. Bernstein K, Zacharias J, Blanchard JF, Yu BN, Shaw SY. Model for equitable care and outcomes for remote full care hemodialysis units. *Clin J Am Soc Nephrol.* 2010 Apr;5(4):645-51.
11. Carnahan RM. Mini-sentinel's systematic reviews of validated methods for identifying health outcomes using administrative data: Summary of findings and suggestions for future research. *Pharmacoepidemiol Drug Saf.* 2012 Jan;21 Suppl 1:90-9.
12. Clement FM, James MT, Chin R, Klarenbach SW, Manns BJ, Quinn RR, et al. Validation of a case definition to define chronic dialysis using outpatient administrative data. *BMC Med Res Methodol.* 2011 Mar 1;11:25.
13. Rothmanm KJ, Greenland S. *Modern Epidemiology*. 2nd ed. Philadelphia, PA: Lippincott, Williams and Williams; 1998. p. 738.

- 1  
2 14. Public Health Agency of Canada. How healthy are rural Canadians? An assessment of their health  
3 status and health determinants. Summary Report. Ottawa, Canada: 2006.  
4
- 5 15. Dyck R, Osgood N, Lin T, Gao A, Stang M. End stage renal disease among people with diabetes: A  
6 comparison of First Nations people and other Saskatchewan residents from 1981 to 2005. CANADIAN  
7 JOURNAL OF DIABETES. 2010;34(4):324.  
8
- 9 16. Hemmelgarn BR. CSCI Joe Doupe Lecture: End stage renal disease among Aboriginal people. Clin  
10 Invest Med. 2006 Dec;29(6):383-7.  
11
- 12 17. Ward MM. Access to care and the incidence of end-stage renal disease due to diabetes. Diabetes  
13 Care. 2009 June 01;32(6):1032-6.  
14
- 15 18. Smith KB, Humphreys JS, Wilson MGA. Addressing the health disadvantage of rural populations: How  
16 does epidemiological evidence inform rural health policies and research? Australian Journal of Rural  
17 Health. 2008;16:56-66.  
18
- 19 19. Liu JJ. Health professional shortage and health status and health care access. Journal of Health Care  
20 for the Poor & Underserved. 2007;18(3):590-598.  
21
- 22 20. Thomlinson E, McDonagh MK, Baird Crooks K, Lees M. Health beliefs of rural Canadians: Implications  
23 for practice. Australian Journal of Rural Health. 2004;12:258-263.  
24
- 25 21. Pampalon R, Martinez J, Hamel D. Does living in rural areas make a difference for health in Québec?  
26 Health and Place. 2006;12(4):421-435.  
27
- 28 22. van Walraven C, Austin PC, Manuel D, Knoll G, Jennings A, Forster AJ. The usefulness of  
29 administrative databases for identifying disease cohorts is increased with a multivariate model. J Clin  
30 Epidemiol. 2010 Dec;63(12):1332-41.  
31  
32  
33  
34  
35  
36  
37  
38  
39  
40  
41  
42  
43  
44  
45  
46  
47  
48  
49  
50  
51  
52  
53  
54  
55  
56  
57  
58  
59  
60
